1 **Native and engineered clifednamide biosynthesis in multiple *Streptomyces* spp.**

2 Yunci Qi<sup>1</sup>, Edward Ding<sup>1</sup>, Joshua A.V. Blodgett<sup>1\*</sup>

3

4 <sup>1</sup>Department of Biology, Washington University in St Louis, St Louis, Missouri 63130, United  
5 States

6 \*Corresponding author: [jblodgett@wustl.edu](mailto:jblodgett@wustl.edu)

7

8 **ABSTRACT**

9 Polycyclic tetramate macrolactam (PTM) natural products are produced by actinomycetes and  
10 other bacteria. PTMs are often bioactive, and the simplicity of their biosynthetic clusters make  
11 them attractive for bioengineering. Clifednamide-type PTMs from *Streptomyces* sp. JV178 contain  
12 a distinctive ketone group, suggesting the existence of a novel PTM oxidizing enzyme. Here, we  
13 report the new cytochrome P450 enzyme (CftA) is required for clifednamide production. Genome  
14 mining was used to identify several new clifednamide producers, some having improved  
15 clifednamide yields. Using a parallel synthetic biology approach, CftA isozymes were used to  
16 engineer the ikarugamycin pathway of *Streptomyces* sp. NRRL F-2890 to yield clifednamides.  
17 Further, we observed that strong CftA expression leads to the production of a new PTM,  
18 clifednamide C. We demonstrate the utility of both genome mining and synthetic biology to rapidly  
19 increase clifednamide production and identify a PTM tailoring enzyme for rational molecule  
20 design.

21

## 22 **KEYWORDS**

23 *Streptomyces*, natural products, cytochrome P450, polycyclic tetramate macrolactams, genome  
24 mining, metabolic engineering

25 Actinomycete bacteria are widely studied for their ability to produce diverse bioactive secondary  
26 metabolites. Already the source of nearly two-thirds of clinical antibiotics<sup>1</sup>, actinomycete genome  
27 sequencing has revealed a wealth of previously unrecognized biosynthetic gene clusters<sup>2-4</sup>. With  
28 many of these clusters apparently encoding drug-like molecules, these organisms remain as  
29 promising sources of much-needed future antibiotics and other therapeutics<sup>5,6</sup>.

30 An unusually high proportion of sequenced actinomycete genomes contain polycyclic tetramate  
31 macrolactam (PTM) biosynthetic clusters<sup>7</sup>. PTMs are of therapeutic interest, with family members  
32 having documented activity against bacteria, protozoa, fungi, plants, and cancer cell lines<sup>8-11</sup>. In  
33 addition to their bioactivity, the relative simplicity and commonality of PTM biosynthetic loci has  
34 made them attractive targets for genomics-based discovery and engineering via synthetic biology  
35 approaches<sup>12-14</sup>. Despite containing only 3-6 genes, these small clusters encode diverse structures<sup>15</sup>  
36 (Figure 1).

37 The clifednamides are a family of PTMs discovered from *Streptomyces* sp. JV178, an  
38 environmental isolate from Connecticut garden soil<sup>16</sup>. The clifednamides have therapeutic  
39 potential due to their structural similarity with ikarugamycin, which is active against a wide range  
40 of organisms<sup>8,10,11</sup>. The clifednamides are distinguished from ikarugamycin by a ketone group on  
41 carbon 29 (Figure 1A). Despite growing research interest in PTMs, no structure-function studies  
42 have been carried out thus far. Comparing the bioactivities of the long-studied ikarugamycin and

43 its clifednamide analogs could provide valuable insight. However, efforts to extensively profile  
44 clifednamide bioactivities have been limited by low yields from JV178 (Table 1).

45 To understand clifednamide biosynthesis towards engineering its production, JV178 was genome-  
46 sequenced (see Methods). Due to the structural similarity of ikarugamycin and clifednamides, we  
47 expected JV178 would encode an ikarugamycin-like PTM cluster. Using BLAST, we identified a  
48 5-gene PTM locus that likely encodes the clifednamides. Homology analysis of these genes  
49 allowed us to propose a plausible clifednamide biosynthetic pathway (Figure S1).

50 Three of the genes, *ikaA*, *ikaB* and *ikaC*, recapitulate the ikarugamycin cluster<sup>12</sup>. As such,  
51 clifednamide biosynthesis likely begins with IkaA, an iterative polyketide synthase/non-ribosomal  
52 peptide synthase fusion protein. Biochemical studies of its ortholog in HSAF biosynthesis<sup>17</sup>  
53 indicate the protein initiates PTM biosynthesis by ligating two polyketide chains, built from six  
54 malonyl-CoA precursor units each, to the non-proteinogenic amino acid L-ornithine (Figure S1)<sup>18</sup>.  
55 The resulting tetramate-polyene product is reductively cyclized by IkaB and IkaC to produce the  
56 5-6-5 carbon ring system shared by ikarugamycin and clifednamides<sup>19</sup>. A *ftdA* homolog was also  
57 found in the cluster. A PTM hydroxylase common to a number of PTM pathways<sup>7,20,21</sup>, *ftdA* is  
58 likely responsible for the C25 hydroxyl group of clifednamide B. The remaining open reading  
59 frame is encoded between *ikaA* and *ikaB* (Figure 1A). Predicted to encode a novel cytochrome  
60 P450, we reasoned its cognate enzyme (designated CftA, for clifednamide tailoring A) may install  
61 the C29 ketone of the clifednamides. No additional PTM genes were detected in the JV178  
62 genome, further suggesting the *cftA*-containing cluster encodes the clifednamides.

63 JV178 was found to be a poor host for genetic analysis (unpublished), preventing experimental  
64 verification of the above model. To further study clifednamide biosynthesis, a genome mining  
65 approach was used to identify additional producers. Several actinomycetes having publicly

66 available genome sequences were found to harbor PTM clusters syntenic with the JV178 locus  
67 (Figure S2). Four such strains were obtained from the USDA NRRL strain collection. Each strain  
68 was grown on a panel of solid media and extracted with ethyl acetate for LC-MS/MS analysis.  
69 Clifednamide production was determined by comparison with extracts containing clifednamides  
70 A and B from JV178. All four strains appear to produce both compounds based on product  
71 retention times, UV absorbance spectra, and mass fragmentation patterns (Figure 3). Notably, *S.*  
72 *negayawaensis* produced approximately 26  $\mu\text{M}$  of clifednamides A and B combined, about 10-  
73 fold greater than JV178 (Figure 3E, Table 1). The other three strains, *S. purpeofuscus*, *S. sp. F-*  
74 *6131*, and *S. torulosus* produced considerably lower amounts (Figure 3B-D). Interestingly, a local  
75 PTM-producing soil isolate (*Streptomyces sp. KL33*) also produced clifednamide A titers  
76 comparable to *S. negayawaensis*, but no clifednamide B was detected (Figure 3F).

77 Of the newly obtained clifednamide producers, *Streptomyces. sp. NRRL F-6131* proved to be the  
78 most amenable to intergeneric conjugation. This strain was thus used to interrogate clifednamide  
79 biosynthesis. A *rpsL*(K43N) mutant was isolated for streptomycin counterselection<sup>22</sup>. As noted for  
80 other *Streptomyces* metabolites, this lesion also increased PTM production<sup>23</sup> (Figure 2A&B).  
81 Markerless *cftA* deletion resulted in the loss of clifednamide production. However, the strain  
82 produced increased amounts of a previously minor compound ( $m/z$  479) (Figure 2C). This peak  
83 was confirmed to be ikarugamycin by comparison with an authentic standard, and its apparent  
84 accumulation is consistent with it being a clifednamide biosynthetic precursor. An additional peak  
85 of interest ( $m/z$  495) was detected in the  $\Delta cftA$  mutant. This was tentatively identified as  
86 butremycin, a known C25-hydroxyl derivative of ikarugamycin<sup>24</sup>. The experimental mass matches  
87 the compound and its UV profile is consistent with other PTMs. MS/MS analysis revealed a  
88 daughter ion with a  $m/z$  of 154, consistent with the C25-hydroxylated PTMs such as clifednamide

89 B. Because butremycin is structurally equivalent to clifednamide B lacking the C29 ketone, it is  
90 an expected biosynthetic precursor.

91 Our biosynthetic analyses suggested an ikarugamycin-producing microbe could be engineered to  
92 produce clifednamide via *cftA* expression. Using genome mining, *Streptomyces* sp. NRRL F-2890  
93 was identified as a candidate host. Characterization of the strain revealed it has robust flux,  
94 producing up to 28  $\mu\text{M}$  (13.6 mg/L) of ikarugamycin (Figure 4A). A genetic system was  
95 established in the strain to systematically evaluate the biosynthetic effects of a panel of CftA  
96 isozymes. To do this, four *cftA* orthologs were cloned under two versions of the strong constitutive  
97 *PermE\** promoter. While the original *ermE* promoter in *Saccharopolyspora erythraea* begins  
98 transcription at the start codon<sup>25</sup>, a short 5'-UTR containing a ribosome binding site is often added  
99 to *PermE\** expression plasmids. The two plasmids used in this study have *PermE\** promoters with  
100 variant 5'-UTR sequences that differentially express a *xylE* reporter (Figure S3)<sup>26</sup>.

101 The resulting panel of *PermE\**-*cftA* constructs were chromosomally integrated in F-2890 at the  
102  $\Phi\text{C31}$  *attB* site<sup>27</sup> following intergeneric conjugation. As expected, the resulting strains all produced  
103 clifednamide A (Figures 4, S4). Interestingly, CftA homologs from different strains produced  
104 varying amounts of clifednamide A, with the JV178 homolog producing the most (20  $\mu\text{M}$ , Table  
105 1). No clifednamide B or butremycin was observed in any of these strains due to *ftdA* being absent  
106 in the host. In general, constructs driven by the stronger pHM11a<sup>28</sup>-derived promoter converted  
107 more ikarugamycin precursor to clifednamide A than the pDA1652-derived promoter<sup>29</sup>.

108 Additionally, all four pHM11a constructs and two pDA1652 constructs resulted in a new peak  
109 having a characteristic PTM UV profile and *m/z* 509 (Figures 4, S4). MS/MS fragmentation  
110 produced a daughter ion with *m/z* of 139, a diagnostic daughter ion of PTM molecules lacking C25  
111 hydroxylation such as clifednamide A, ikarugamycin, and capsimycin<sup>30</sup>. Furthermore, metabolic

112 labeling with  $d_7$ -L-ornithine results in a correspondingly heavier mass ( $m/z$  516) and daughter ion  
113 ( $m/z$  146). These results parallel our results from clifednamide A (Figure S5). Based on these  
114 results, we designated this peak clifednamide C. Its mass difference ( $m/z$  +30) from ikarugamycin  
115 ( $m/z$  479) and shorter C18 retention time suggest it has been oxidized twice. The first oxidation  
116 presumably corresponds to the C29 keto oxidation by CftA to produce clifednamide A ( $m/z$  493).  
117 The subsequent oxidation of clifednamide A to clifednamide C is consistent with a hydroxylation  
118 ( $m/z$  +16), perhaps resulting from above-optimal CftA activity. A clifednamide C peak was also  
119 detected in *S. negayawaensis*, confirming its production in un-engineered clifednamide producers.

120 The tandem oxidation of clifednamide A by CftA is analogous to the activity of the recently  
121 characterized IkaD<sup>30</sup>. A cytochrome P450 associated with some ikarugamycin biosynthetic  
122 clusters, IkaD primarily installs an epoxide across carbons 7 and 8. However, it can also  
123 hydroxylate C29, the same position targeted for keto insertion by CftA (Figure S1). We noted that  
124 *Streptomyces* sp. NRRL F-2890, the ikarugamycin-producing host strain, also contains an IkaD  
125 homolog. While F-2890 produces a small peak that is consistent with the mass of ikarugamycin  
126 epoxide, this peak remains minor in CftA expression strains (unpublished data). Therefore, CftA  
127 apparently lacks the epoxidase activity of IkaD.

128 Presumed CftA orthologs mined from public sequence repositories all share at least 80% amino  
129 acid sequence identity, but have no more than 57% residue identity with the IkaD orthologs. Thus,  
130 under the cytochrome P450 naming convention<sup>31</sup>, CftA and IkaD are members of distinct  
131 subfamilies within the CYP107 clade. Aside from IkaD and CftA, additional PTM-locus P450  
132 enzymes also fall within the CYP107 group (Figure S6, S7). Beyond CYP107 family P450's, our  
133 data also indicates the existence of three other distinct CYP families (<40% identity with CYP107)  
134 associated with genome mined PTM-loci. With the largest group being comprised of FtdF

135 homologs (as found in the frontalamide cluster), no role has been established yet for these  
 136 enzymes. Together, our analyses suggest further investigations into PTM-associated CYPs will  
 137 continue to reveal enzymes with varied PTM scaffold specificity, oxidative activities and  
 138 regioselectivity.

139 In conclusion, we used a combination of comparative genomics, genetics, and genome mining to  
 140 reveal the novel cytochrome P450 CftA is responsible for clifednamide production. We engaged  
 141 in a synthetic biological approach to engineer clifednamide production by utilizing *cftA* orthologs  
 142 sourced from newly identified clifednamide producing strains. In addition to increased  
 143 clifednamide production over *Streptomyces* sp. JV178, we noted substantial differences from *cftA*  
 144 homologs. As such, this work demonstrates the value of leveraging genome-mined panels of  
 145 isozymes in a plug-and-play fashion to rapidly identify efficient biocatalysts. Further, we show  
 146 CftA belongs to an expanding family of PTM cytochrome P450 enzymes with the apparent  
 147 capability to carry out multiple oxidation events. These enzymes may be useful to engineer  
 148 diversity-oriented panels of PTMs for future bioactivity and structure-function analyses.

149 **Table 1.** PTM titers from key strains in this study

150

| Strain                                                                              | Ikarugamycin            | Clifednamide A           | Clifednamide B | Clifednamide C           |
|-------------------------------------------------------------------------------------|-------------------------|--------------------------|----------------|--------------------------|
| <i>S. sp.</i> JV178                                                                 | Undetected              | 0.94 $\mu$ M             | 1.87 $\mu$ M   | Undetected               |
| <i>S. sp.</i> NRRL F-2890                                                           | 28.2 $\pm$ 5.27 $\mu$ M | Undetected               | Undetected     | Undetected               |
| <i>S. sp.</i> NRRL F-2890<br><i>PermE</i> * <sub>pDA1652-cftA<sub>JV178</sub></sub> | 1.10 $\pm$ 0.68 $\mu$ M | 13.73 $\pm$ 1.04 $\mu$ M | Undetected     | 2.62 $\pm$ 0.70 $\mu$ M  |
| <i>S. sp.</i> NRRL F-2890<br><i>PermE</i> * <sub>pHM11a-cftA<sub>JV178</sub></sub>  | Undetected              | 19.84 $\pm$ 4.86 $\mu$ M | Undetected     | 16.56 $\pm$ 0.01 $\mu$ M |
| <i>S. negayawaensis</i>                                                             | Undetected              | 19.53 $\mu$ M            | 6.46 $\mu$ M   | 7.20 $\mu$ M             |

151 **METHODS**

152 **Strains, Plasmids, Primers, Enzymes, Chemicals and General Methods**

153 Strains, plasmids, and primers are described in Tables S1-3. Several strains were obtained from  
154 the Agricultural Research Service Culture Collection (NRRL). All primers were purchased from  
155 Integrated DNA Technologies. All restriction enzymes and Taq polymerase were purchased from  
156 New England BioLabs. T4 ligase was purchased from New England BioLabs and ThermoFisher.  
157 KOD Hot Start DNA Polymerase (EMD Millipore) in FailSafe PCR 2X PreMix (Epicentre) was  
158 used to amplify DNA sequences for cloning from *Streptomyces* genomic DNA. Taq polymerase  
159 was used for colony PCR. Ikarugamycin was purchased from Santa Cruz Biotechnology. All other  
160 chemicals were obtained from Sigma Aldrich or Fisher Scientific. *Streptomyces* genomic DNA  
161 was prepared for PCR by grinding a colony in 100  $\mu$ L DMSO as described by Van Dessel *et al*<sup>32</sup>.  
162 Standard protocols for manipulating *E. coli* were based on those of Sambrook *et al*<sup>33</sup>.  
163 Streptomycetes were routinely propagated on ISP2 agar<sup>34</sup> and Trypticase Soy Broth (Difco) at  
164 28°C. Glass beads were added to liquid cultures to disrupt mycelial clumps.

165 **Genome sequencing of JV178** Genomic DNA was extracted from TSB-grown mycelia as  
166 previously described<sup>35</sup>. Illumina 250-bp paired-end sequencing libraries were prepared using the  
167 Nextera sample prep kit (Illumina Inc., San Diego, CA, USA) and were sequenced on an Illumina  
168 MiSeq platform using V2 chemistry (Illumina, Inc., San Diego, CA, USA) by the Washington  
169 University in St Louis Genome Technology Access Center. Sequencing reads were trimmed and  
170 *de novo* assembled using the CLC Genomics Workbench (CLC Bio-Qiagen, Aarhus, Denmark).  
171 An annotated sequence for the *Streptomyces* sp. JV178 clifednamide cluster was deposited on  
172 GenBank (accession no. MF89327).



173 **Streptomycte conjugations.** *S. sp.* F-6131 spores were collected from ISP4 agar<sup>34</sup>, while *S. sp.*  
174 F-2890 spores were collected from ISP2 agar. Spores were harvested using TX Buffer<sup>36</sup>.  
175 Conjugations were performed using JV156 as the general *E. coli* donor as previously described<sup>7</sup>.  
176 Exconjugants were selected with 50 µg/mL colistin and 25 or 50 µg/mL apramycin. Successful  
177 conjugations were verified by colony PCR.

178 ***cftA* markerless gene disruption** The *cftA* coding sequence of *S. sp.* F-6131 was replaced with a  
179 truncated gene containing the first nine codons and the last ten codons of the wild-type coding  
180 sequence with homologous recombination as previously described<sup>37</sup>. Streptomycin-resistant (Str<sup>R</sup>)  
181 mutants of *S. sp.* F-6131 were isolated on ISP2 + Str<sup>25</sup> agar. The *rpsL* genes were amplified and  
182 sequenced. JV739 bearing the *rpsL* (K43N) mutation was chosen for subsequent experiments as  
183 the mutation did not disrupt clifednamide production. The 990 bp upstream flanking region of *cftA*  
184 was amplified using primers YQ273 and YQ274 (introduced a *XbaI* site and homology to pUC19).  
185 The 1079 bp downstream flanking region of *cftA* was amplified using primers YQ275 (introduced  
186 homology to the upstream flanking region) and YQ276 (introduced a *HindIII* site and homology  
187 to pUC19). The 2668 bp fragment of pUC19 was amplified with primers YQ268 and YQ269. PCR  
188 amplicons were assembled using the NEBuilder HiFi Assembly kit (New England BioLabs). The  
189 resulting pUC19- $\Delta cftA$  was digested with *XbaI* and *HindIII* and the 1956 bp fragment was ligated  
190 into pJVD52.1 digested with *XbaI/HindIII*. The resulting pJVD52.1- $\Delta cftA$  was introduced into  
191 JV739 by intergeneric conjugation, and apramycin-resistant (Apr<sup>R</sup>) exconjugants were selected.  
192 Exconjugants were grown in TSB non-selectively at 37°C and double-recombinants were selected  
193 for on ISP2 + Str<sup>100</sup>. The  $\Delta cftA$  mutants were confirmed by PCR.

194 ***cftA* heterologous expression** The *cftA* homologs were amplified using primers ED9-16  
195 (introduced *NdeI* and *XbaI* sites). The PCR products were digested with *NdeI* and *XbaI* and ligated

196 into pJMD2 or pJMD3 to generate plasmids pED1-8. After confirming the inserts by Sanger  
197 sequencing (Genewiz), the constructs were introduced into *S. sp.* F-2890 by intergeneric  
198 conjugation.

199 **PTM detection by HPLC-MS/MS** Strains were cultivated in 15 mL of TSB liquid medium in  
200 125 mL Erlenmeyer flasks shaken in 1-inch orbitals at 250rpm at 28°C. 6 mm glass beads were  
201 added to disrupt mycelial clumps. After 2 days of growth, 200 µL of cultures were plated on HT<sup>38</sup>,  
202 ISP4, ATCC172, or JBFM1 (adapted from Medium 2<sup>39</sup>: 2% D-fructose; 5% D(+)-Mannose;  
203 0.167% Na-L-aspartate; 0.06% L-arginine HCl; 0.05% L-histidine HCl; 0.2% K<sub>2</sub>HPO<sub>4</sub>; 0.2%  
204 KH<sub>2</sub>PO<sub>4</sub>; 0.5% NaCl; 0.006% ZnSO<sub>4</sub>·7H<sub>2</sub>O; 0.0256% MgSO<sub>4</sub>·7H<sub>2</sub>O; 0.051% MgCl<sub>2</sub>·6H<sub>2</sub>O;  
205 0.001% CoCl<sub>2</sub>·6H<sub>2</sub>O; 0.036% NaSO<sub>4</sub>; 2.13% MES free acid; 1.5% agar; 2% R2 Trace elements;  
206 1.5% Agar; pH 6.0) and incubated at 28°C. After 6 days, the agar was diced and immersed in ethyl  
207 acetate overnight. The ethyl acetate was evaporated at low pressure and the extract was suspended  
208 in 400 µL of HPLC-grade methanol and syringe filtered.

209 Analysis was performed using a Phenomenex Luna C18 column (75 x 3 mm, 3 µm pore size)  
210 installed on an Agilent 1260 Infinity HPLC connected to an Agilent 6420 Triple-Quad mass  
211 spectrometer using the following method:  $T = 0$ , 5% B;  $T = 3$ , 40% B;  $T = 13$ , 60% B;  $T = 17$ ,  
212 100% B,  $T = 20$ , 100% B; A: water + 0.1% formic acid, B: acetonitrile + 0.1% formic acid; 0.9  
213 mL/min. 10 µL of the methanol-dissolved extract was injected per run. The precursor ion scan  
214 mode was used to identify molecules that fragmented (collision energy, 30 V) into daughter ions  
215 with  $m/z$  of 139.2 or 154.2. The resulting data was analyzed offline with Agilent MassHunter  
216 Qualitative Analysis software. PTMs were quantified using integrated peak areas of absorbance at  
217 320nm detected with an in-line diode array detector (DAD). A standard curve was generated using  
218 an authentic ikarugamycin standard.

219 **ASSOCIATED CONTENT**

220 Supplementary methods, tables, figures, and references

221

222 **AUTHOR INFORMATION**

223 **Corresponding author**

224 \*Phone: 314-935-6233, Fax: 314-935-4432, E-mail: [jblodgett@wustl.edu](mailto:jblodgett@wustl.edu)

225 **Author contributions**

226 Y.Q., E.D., and J.A.V.B. designed the experiments and wrote the manuscript. Y.Q. and E.D.  
227 performed experiments.

228 **Notes**

229 The authors declare no competing interest

230

231 **ACKNOWLEDGEMENTS**

232 We thank Dr. Arpita Bose for helpful comments and discussions and John M. D'Alessandro for  
233 plasmids pJMD1, pJMD2, and pJMD3. We acknowledge former WUSTL BIOL3493 students  
234 Kevin Lou for isolation of strain *Streptomyces sp.* KL33 and Naveen Jain for designing *attB*<sup>ΦC31</sup>  
235 integration check primers. We also like to thank Dr. Kim Medley of Tyson Valley Research Center  
236 for access to soil samples used in the isolation of KL33. This work was supported by Washington  
237 University in St Louis New Faculty Start Up funds to Joshua Blodgett.

238 **REFERENCES**

- 239 (1) Challis, G. L.; Hopwood, D. A. *Proc. Natl. Acad. Sci.* **2003**, *100* (suppl 2), 14555–14561.
- 240 (2) Nett, M.; Ikeda, H.; Moore, B. S. *Nat. Prod. Rep.* **2009**, *26* (11), 1362–1384.
- 241 (3) Challis, G. L. *Microbiology* **2008**, *154* (6), 1555–1569.
- 242 (4) Ju, K.-S.; Gao, J.; Doroghazi, J. R.; Wang, K.-K. A.; Thibodeaux, C. J.; Li, S.; Metzger, E.; Fudala,  
243 J.; Su, J.; Zhang, J. K.; Lee, J.; Cioni, J. P.; Evans, B. S.; Hirota, R.; Labeda, D. P.; Donk, W. A. van  
244 der; Metcalf, W. W. *Proc. Natl. Acad. Sci.* **2015**, *112* (39), 12175–12180.
- 245 (5) Neu, H. C. *Science* **1992**, *257* (5073), 1064–1073.
- 246 (6) Laxminarayan, R.; Duse, A.; Wattal, C.; Zaidi, A. K. M.; Wertheim, H. F. L.; Sumpradit, N.;  
247 Vlieghe, E.; Hara, G. L.; Gould, I. M.; Goossens, H.; Greko, C.; So, A. D.; Bigdeli, M.; Tomson,  
248 G.; Woodhouse, W.; Ombaka, E.; Peralta, A. Q.; Qamar, F. N.; Mir, F.; Kariuki, S.; Bhutta, Z. A.;  
249 Coates, A.; Bergstrom, R.; Wright, G. D.; Brown, E. D.; Cars, O. *Lancet Infect. Dis.* **2013**, *13* (12),  
250 1057–1098.
- 251 (7) Blodgett, J. A.; Oh, D.-C.; Cao, S.; Currie, C. R.; Kolter, R.; Clardy, J. *Proc. Natl. Acad. Sci.* **2010**,  
252 *107* (26), 11692–11697.
- 253 (8) Jomon, K.; Kuroda, Y.; Ajisaka, M.; Sakai, H. *J. Antibiot. (Tokyo)* **1972**, *25* (5), 271–280.
- 254 (9) Ding, Y.; Li, Z.; Li, Y.; Lu, C.; Wang, H.; Shen, Y.; Du, L. *RSC Adv.* **2016**, *6* (37), 30895–30904.
- 255 (10) Onelli, E.; Prescianotto-Baschong, C.; Caccianiga, M.; Moscatelli, A. *J. Exp. Bot.* **2008**, *59* (11),  
256 3051–3068.
- 257 (11) Popescu, R.; Heiss, E. H.; Ferk, F.; Peschel, A.; Knasmueller, S.; Dirsch, V. M.; Krupitza, G.;  
258 Kopp, B. *Mutat. Res. Mol. Mech. Mutagen.* **2011**, *709–710*, 60–66.
- 259 (12) Antosch, J.; Schaefers, F.; Gulder, T. A. M. *Angew. Chem. Int. Ed.* **2014**, *53* (11), 3011–3014.
- 260 (13) Luo, Y.; Huang, H.; Liang, J.; Wang, M.; Lu, L.; Shao, Z.; Cobb, R. E.; Zhao, H. *Nat. Commun.*  
261 **2013**, *4*.

- 262 (14) Zhang, M. M.; Wong, F. T.; Wang, Y.; Luo, S.; Lim, Y. H.; Heng, E.; Yeo, W. L.; Cobb, R. E.;  
263 Enghiad, B.; Ang, E. L.; Zhao, H. *Nat. Chem. Biol.* **2017**, *13* (6), 607–609.
- 264 (15) Zhang, G.; Zhang, W.; Saha, S.; Zhang, C. *Curr. Top. Med. Chem.* **2016**, *16* (15), 1727–1739.
- 265 (16) Cao, S.; Blodgett, J. A. V.; Clardy, J. *Org. Lett.* **2010**, *12* (20), 4652–4654.
- 266 (17) Yu, F.; Zaleta-Rivera, K.; Zhu, X.; Huffman, J.; Millet, J. C.; Harris, S. D.; Yuen, G.; Li, X.-C.; Du,  
267 L. *Antimicrob. Agents Chemother.* **2007**, *51* (1), 64–72.
- 268 (18) Li, Y.; Chen, H.; Ding, Y.; Xie, Y.; Wang, H.; Cerny, R. L.; Shen, Y.; Du, L. *Angew. Chem.* **2014**,  
269 *126* (29), 7654–7660.
- 270 (19) Zhang, G.; Zhang, W.; Zhang, Q.; Shi, T.; Ma, L.; Zhu, Y.; Li, S.; Zhang, H.; Zhao, Y.-L.; Shi, R.;  
271 Zhang, C. *Angew. Chem. Int. Ed.* **2014**, *53* (19), 4840–4844.
- 272 (20) Li, Y.; Huffman, J.; Li, Y.; Du, L.; Shen, Y. *MedChemComm* **2012**, *3* (8), 982.
- 273 (21) Greunke, C.; Antosch, J.; Gulder, T. A. M. *Chem Commun* **2015**, *51* (25), 5334–5336.
- 274 (22) Hosted, T. J.; Baltz, R. H. *J. Bacteriol.* **1997**, *179* (1), 180–186.
- 275 (23) Hosoya, Y.; Okamoto, S.; Muramatsu, H.; Ochi, K. *Antimicrob. Agents Chemother.* **1998**, *42* (8),  
276 2041–2047.
- 277 (24) Kyeremeh, K.; Acquah, K.; Sazak, A.; Houssen, W.; Tabudravu, J.; Deng, H.; Jaspars, M. *Mar.*  
278 *Drugs* **2014**, *12* (2), 999–1012.
- 279 (25) Bibb, M. J.; Janssen, G. R.; Ward, J. M. *Gene* **1986**, *41* (2–3), E357–E368.
- 280 (26) Ingram, C.; Brawner, M.; Youngman, P.; Westpheling, J. *J. Bacteriol.* **1989**, *171* (12), 6617–6624.
- 281 (27) Kuhstoss, S.; Rao, R. N. *J. Mol. Biol.* **1991**, *222* (4), 897–908.
- 282 (28) Motamedi, H.; Shafiee, A.; Cai, S.-J. *Gene* **1995**, *160* (1), 25–31.
- 283 (29) Alexander, D. C.; Rock, J.; He, X.; Brian, P.; Miao, V.; Baltz, R. H. *Appl. Environ. Microbiol.*  
284 **2010**, *76* (20), 6877–6887.
- 285 (30) Yu, H.-L.; Jiang, S.-H.; Bu, X.-L.; Wang, J.-H.; Weng, J.-Y.; Yang, X.-M.; He, K.-Y.; Zhang, Z.-  
286 G.; Ao, P.; Xu, J.; Xu, M.-J. *Sci. Rep.* **2017**, *7*, 40689.

- 287 (31) Nelson, D. R. In *Cytochrome P450 Protocols*; Methods in Molecular Biology; Humana Press,  
288 Totowa, NJ, 2006; pp 1–10.
- 289 (32) Van Dessel, W.; Van Mellaert, L.; Geukens, N.; Anné, J. *J. Microbiol. Methods* **2003**, *53* (3), 401–  
290 403.
- 291 (33) Sambrook, J.; Fritsch, E. F.; Maniatis, T. *Mol. Cloning Lab. Man.* **1989**, No. Ed. 2.
- 292 (34) Kieser, T. *Practical Streptomyces Genetics*; John Innes Foundation, 2000.
- 293 (35) Blodgett, J. A. V.; Zhang, J. K.; Metcalf, W. W. *Antimicrob. Agents Chemother.* **2005**, *49* (1), 230–  
294 240.
- 295 (36) Hirsch, C. F.; Ensign, J. C. *J. Bacteriol.* **1976**, *126* (1), 13–23.
- 296 (37) Blodgett, J. A. V.; Thomas, P. M.; Li, G.; Velasquez, J. E.; van der Donk, W. A.; Kelleher, N. L.;  
297 Metcalf, W. W. *Nat. Chem. Biol.* **2007**, *3* (8), 480–485.
- 298 (38) Hickey, R. J.; Tresner, H. D. *J. Bacteriol.* **1952**, *64* (6), 891–892.
- 299 (39) Kojima, I.; Cheng, Y. R.; Mohan, V.; Demain, A. L. *J. Ind. Microbiol.* **1995**, *14* (6), 436–439.
- 300
- 301

302 FIGURES

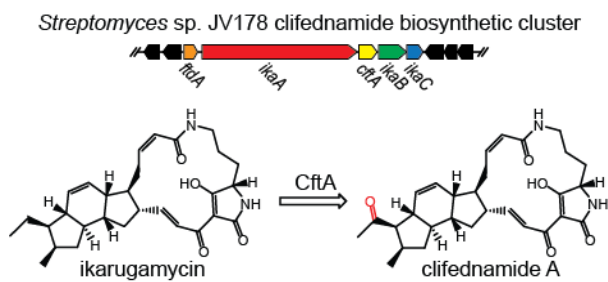

303

304 Graphical abstract

305

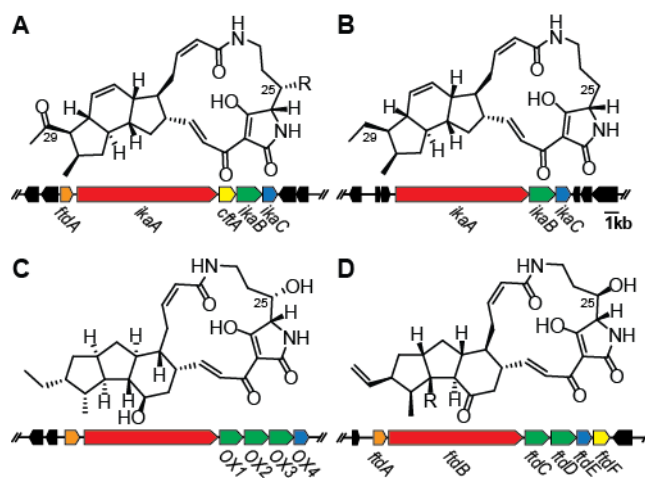

306

307 Figure 1. Representative PTM biosynthetic clusters and their products. (A) the *Streptomyces* sp.

308 JV178 clifednamide cluster (A: R=H, B: R=OH); (B) the *Streptomyces* sp. ZJ306 ikarugamycin

309 cluster; (C) The *Lysobacter enzymogenes* C3 HSAF cluster; (D) the *Streptomyces* sp. SPB78

310 frontalamide cluster (A: R=OH, B: R=H). Orange ORFs encode for sterol desaturases, red for

311 iterative polyketide synthase non-ribosomal peptide synthase fusion proteins, green for FAD-

312 dependent oxidoreductases, blue for zinc-dependent alcohol dehydrogenases, and yellow for

313 cytochrome P450s. ORFs in black are not conserved between PTM biosynthetic clusters.

314



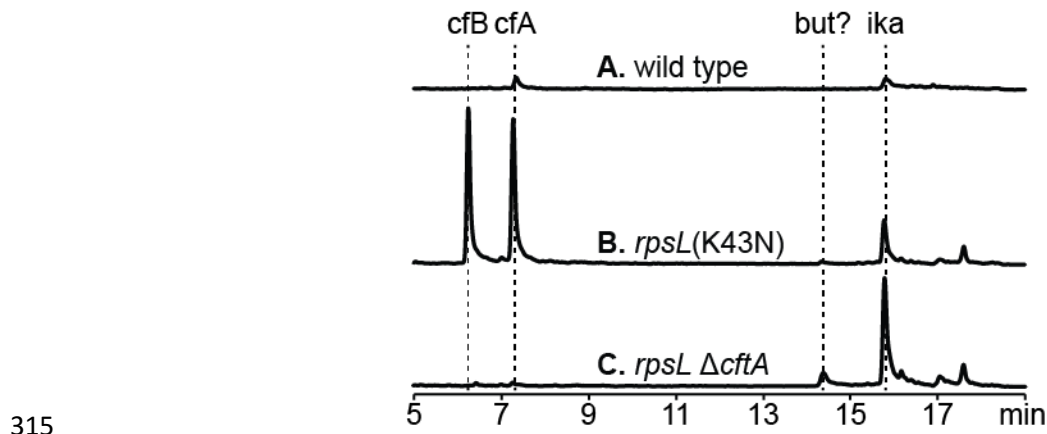

316 Figure 2. Deletion of *cftA* in *S* sp. F-6131. LC-MS/MS chromatograms of extracts from (A) wild-  
317 type *S*. sp. NRRL F-6131, (B) the *rpsL* (K43N) mutant, and (C) the *rpsL*  $\Delta$ *cftA* double mutant. The  
318 peaks for ikarugamycin (*ika*), butremycin (*but*), clifednamide A (*cfA*), and clifednamide B (*cfB*)  
319 are indicated with dotted lines.

320

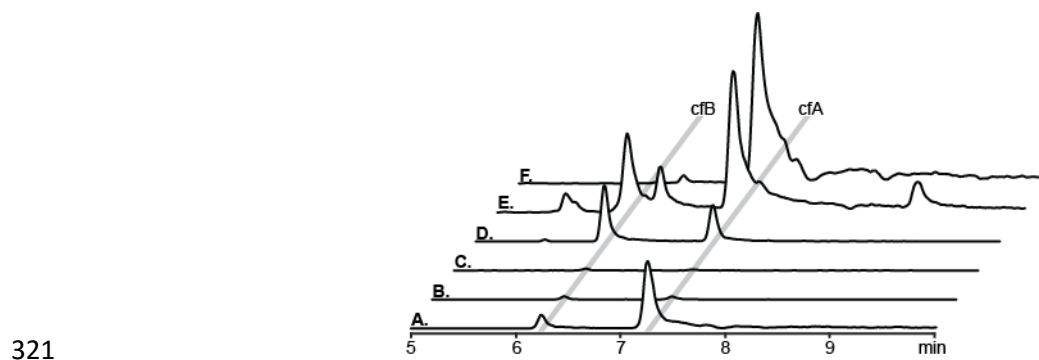

322 Figure 3. Clifednamide production by genome-mined strains. LC-MS/MS chromatograms of  
323 extracts from (A) JV178, (B) *S. purpeofuscus*, (C) *S. sp.* F-6131, (D) *S. torulosus*, (E) *S.*  
324 *negayawaensis*, and (F) KL33. The retention times for clifednamides A and B (CfA and CfB) are  
325 indicated by grey bars.

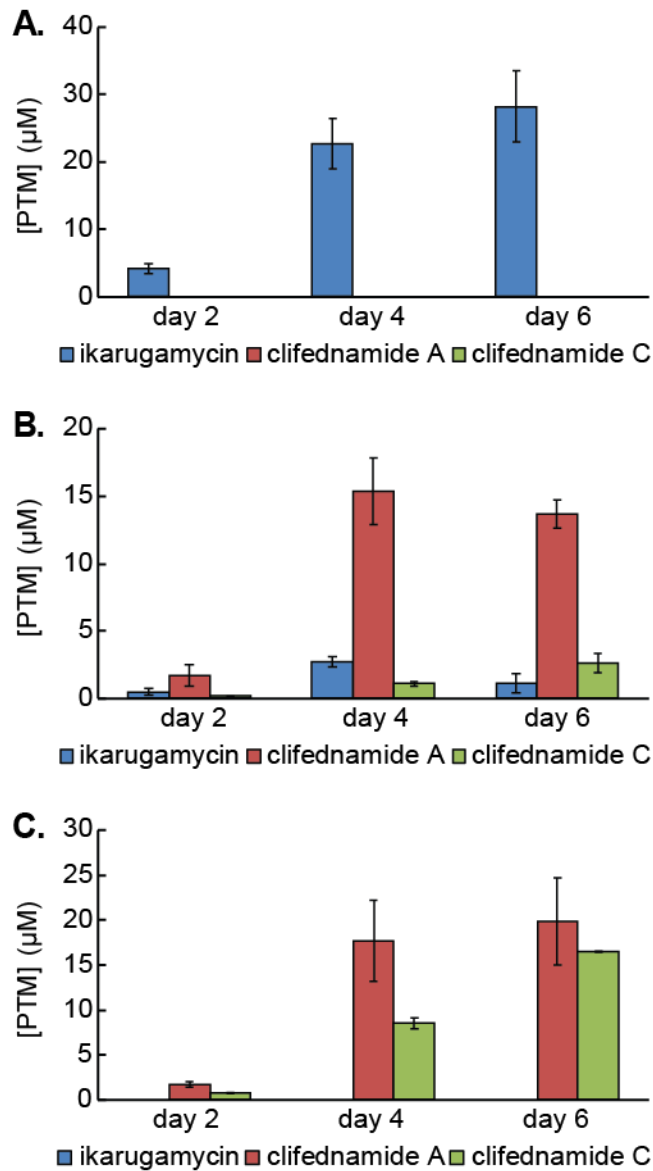

327

328 Figure 4. Production of PTMs in *S. sp. F-2890* expressing CftA. (A) Wild-type *Streptomyces sp.*

329 *F-2890*, (B) *S. sp. F-2890 attB $\Phi$ C31::PermE\*<sub>pDA1652</sub>-CftA<sub>JV178</sub>*, and (C) *S. sp. F-2890*

330 *attB $\Phi$ C31::PermE\*<sub>pHM11a</sub>-CftA<sub>JV178</sub>* were grown in triplicate and extracted at days 2, 4, and 6.

331
